# Supplementary material
Source: PubMed Central journal article supplement (PMC6961977)
Supplement: NIHMS1544454-supplement-1.pdf [file NIHMS1544454-supplement-1.pdf]

**Table E1.** List of candidate variants identified using WES (MAF  $\leq 0.01$ ) and segregate within the family (variants in P1, P2 and not their unaffected sibling or parents).

| Genetic model  | Gene name | Exonic function      | Amino acid change                               | Homozygosity | PolyPhen | SIFT |
|----------------|-----------|----------------------|-------------------------------------------------|--------------|----------|------|
| Recessive      | NADK      | insertion (6 bases)  | p.G414delinsRRG:p.G446delinsRRG:p.G591delinsRRG |              | na       | na   |
| Recessive      | FAT4      | nonsynonymous        | p.Q1257E                                        |              | B        | T    |
| Recessive      | LY6G5C    | nonsynonymous        | p.F53L:p.F56L:p.F54L                            |              | B        | T    |
| Recessive      | AGER      | nonsynonymous        | p.G82S:p.G68S:p.G113S                           |              | P        | T    |
| Recessive      | NOTCH4    | nonsynonymous        | p.G294R                                         |              | D        | T    |
| Recessive      | C6ORF10   | nonsynonymous        | p.G477V:p.G479V:p.G463V:p.G478V                 |              | D        | D    |
| Recessive      | C6ORF10   | nonsynonymous        | p.L264W:p.L266W:p.L250W:p.L257W:p.L265W         |              | D        | D    |
| Recessive      | C6ORF10   | nonsynonymous        | p.G143R:p.G122R:p.G145R:p.G129R                 |              | na       | D    |
| Recessive      | HLA-DRB5  | stopgain             | p.Q220X                                         |              | na       | na   |
| Recessive      | HLA-DRB1  | nonsynonymous        | p.V73M                                          |              | D        | D    |
| Recessive      | HLA-DRB1  | nonsynonymous        | p.V73L                                          |              | D        | T    |
| Recessive      | HLA-DRB1  | nonsynonymous        | p.D70N                                          |              | D        | D    |
| Recessive      | HLA-DRB1  | nonsynonymous        | p.D57Y                                          |              | P        | D    |
| Recessive      | HLA-DRB1  | nonsynonymous        | p.D57N                                          |              | B        | D    |
| Recessive      | HLA-DQA1  | nonsynonymous        | p.M18T                                          |              | B        | T    |
| Recessive      | TRAF3IP2  | nonsynonymous        | p.D10N:p.D19N                                   |              | D        | D    |
| Recessive      | TULP4     | nonsynonymous        | p.S522N                                         |              | B        | T    |
| Recessive      | GLT6D1    | nonsynonymous        | p.P219S                                         |              | D        | T    |
| Recessive      | PITRM1    | nonsynonymous        | p.L64F:p.L441F:p.L785F:p.L883F:p.L884F          |              | D        | D    |
| Recessive      | PITRM1    | nonsynonymous        | p.L113V:p.L145V                                 |              | B        | T    |
| Recessive      | C14ORF178 | nonsynonymous        | p.G31D:p.G61D                                   |              | B        | D    |
| Recessive      | C19ORF33  | insertion (15 bases) | p.K90delinsKEGEGQ                               |              | na       | na   |
| Recessive      | GGN       | nonsynonymous        | p.A517V:p.A434V                                 |              | D        | T    |
| Recessive      | RASGRP4   | nonsynonymous        | p.G165R                                         |              | B        | D    |
| Recessive      | MIA       | nonsynonymous        | p.P16L                                          | 14.7 MB      | na       | na   |
| Recessive      | PSG6      | nonsynonymous        | p.S312F:p.S405F                                 | 14.7 MB      | B        | D    |
| Recessive      | PSG6      | nonsynonymous        | p.I122M:p.I243M                                 | 14.7 MB      | D        | D    |
| Recessive      | ZNF221    | nonsynonymous        | p.V165M                                         | 14.7 MB      | D        | D    |
| Recessive      | ZNF225    | nonsynonymous        | p.R352H                                         | 14.7 MB      | D        | D    |
| Recessive      | CEACAM16  | nonsynonymous        | p.S32I                                          | 14.7 MB      | B        | D    |
| Recessive      | RSPH6A    | nonsynonymous        | p.Q184H:p.Q448H                                 | 14.7 MB      | D        | D    |
| Recessive      | POLD1     | nonsynonymous        | p.R1060C*                                       | 14.7 MB      | D        | D    |
| Recessive      | SIGLEC12  | nonsynonymous        | p.A77T                                          | 14.7 MB      | P        | D    |
| Compound-het   | LRP1B     | nonsynonymous        | p.E3955K                                        |              | B        | T    |
| Compound-het   | LRP1B     | nonsynonymous        | p.V2146F                                        |              | B        | D    |
| Compound-het   | ZFH3      | nonsynonymous        | p.Y865C                                         |              | D        | D    |
| Compound-het   | ZFH3      | nonsynonymous        | p.K520N                                         |              | B        | T    |
| <i>De novo</i> | MUC12     | nonsynonymous        | p.S1610I:p.S1753I                               |              | B        | D    |

\*POLD1 R1060C is in reference to *POLD1* isoform 1 (NM\_001256849.1). PolyPhen and SIFT scores: B: benign; T: tolerant; P: probably deleterious; D: deleterious

**Table E2.** Homozygous regions identified in autosomal chromosomes using WES and segregating within the family.

| Chromosome | Start Position | End Position | Size (MB) | SNPs (Homozygous) |
|------------|----------------|--------------|-----------|-------------------|
| 3          | 130,098,639    | 132,105,588  | 2.007     | 262               |
| 6          | 33,032,788     | 38,650,628   | 5.618     | 1732              |
| 13         | 41,567,248     | 45,563,464   | 3.996     | 555               |
| 19         | 38,040,492     | 38,314,767   | 0.274     | 119               |
| 19         | 39,219,780     | 53,990,002   | 14.770    | 8617              |

**Table E3** Summary of immune repertoire analysis.

| Sample    | Cell Input | Total templates | Unique clonotypes | Productive templates | Unique productive clonotypes |
|-----------|------------|-----------------|-------------------|----------------------|------------------------------|
| HC1-CD8   | 160,000    | 7367            | 4942              | 5825                 | 3964                         |
| HC2-CD8   | 100,000    | 2269            | 2075              | 1838                 | 1687                         |
| S002a-CD8 | 67,000     | 1660            | 1547              | 1415                 | 1318                         |
| P002-CD8  | 93,000     | 2568            | 243               | 1653                 | 187                          |
| S002b-CD8 | 50,000     | 1401            | 496               | 910                  | 416                          |
| P3-CD8    | 30,000     | 735             | 278               | 588                  | 212                          |
| HC1-CD4   | 100,000    | 6550            | 5862              | 5223                 | 4628                         |
| HC2-CD4   | 100,000    | 1341            | 1234              | 1101                 | 1008                         |
| S002a-CD4 | 100,000    | 1475            | 1375              | 1247                 | 1161                         |
| P002-CD4  | 64,000     | 4528            | 3655              | 3693                 | 2936                         |
| S002b-CD4 | 100,000    | 2046            | 1964              | 1773                 | 1703                         |
| P3-CD4    | 57,000     | 4905            | 3358              | 4085                 | 2772                         |
| HC1-B     | 50,000     | 1550            | 1545              | 1272                 | 719                          |
| HC2-B     | 100,000    | 2017            | 2012              | 1676                 | 1032                         |
| S002a-B   | 199,000    | 11838           | 11824             | 9938                 | 6557                         |
| P002-B    | 28,000     | 3148            | 3143              | 2604                 | 1359                         |
| S002b-B   | 75,000     | 1652            | 1643              | 1294                 | 770                          |
| P3-B      | 54,000     | 503             | 497               | 438                  | 249                          |

HC1, healthy control 1; HC2, healthy control 2; S002a, healthy sibling; P002, patient 1; S002b, patient 2; P3, patient 3.

Fig E1

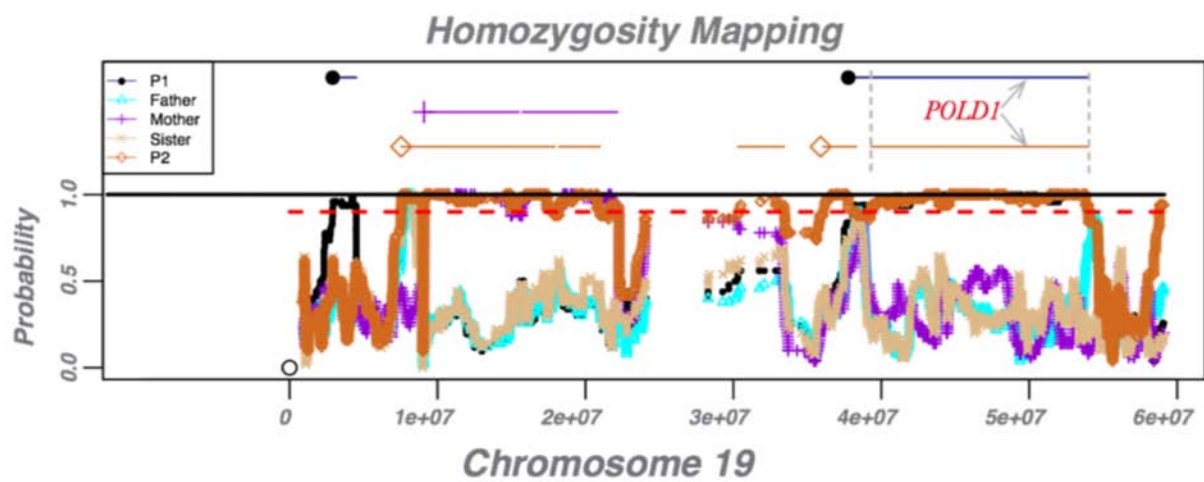

Journal Pre-proof

Fig E2

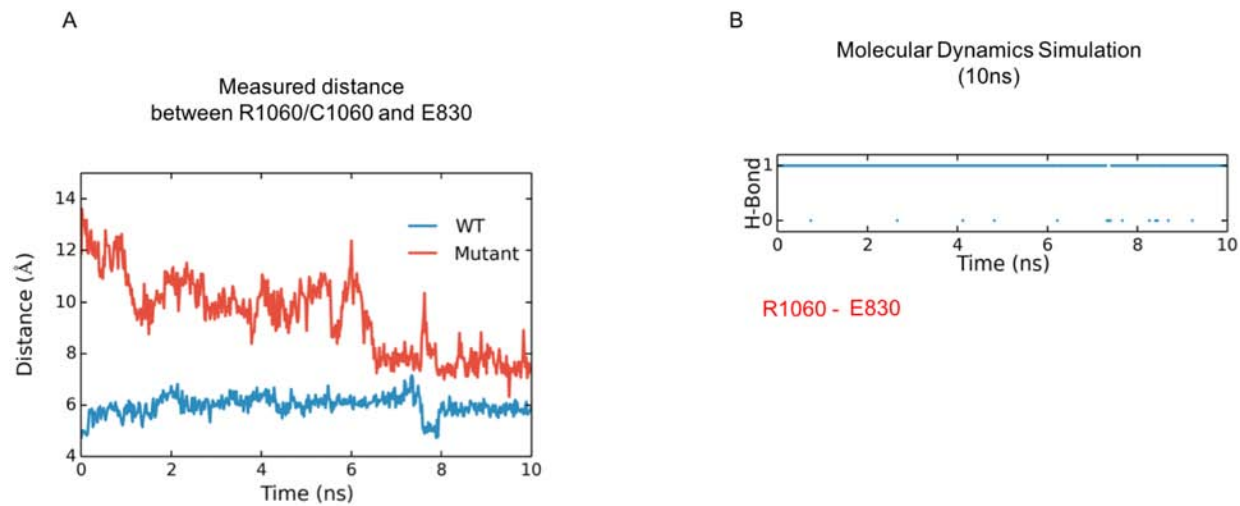

Journal Pre-proof

Fig E3

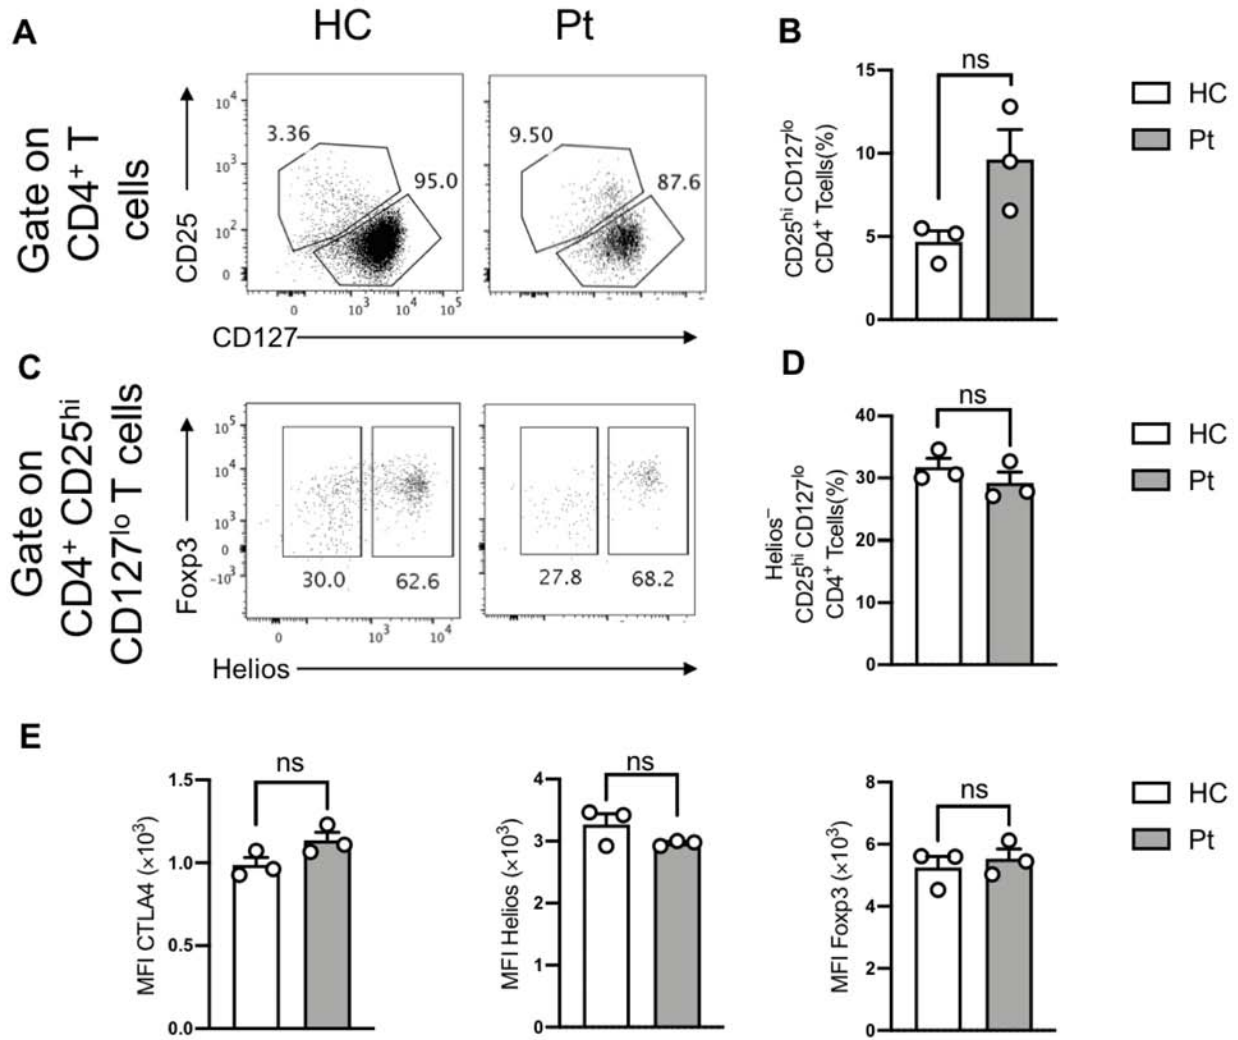

Fig E4

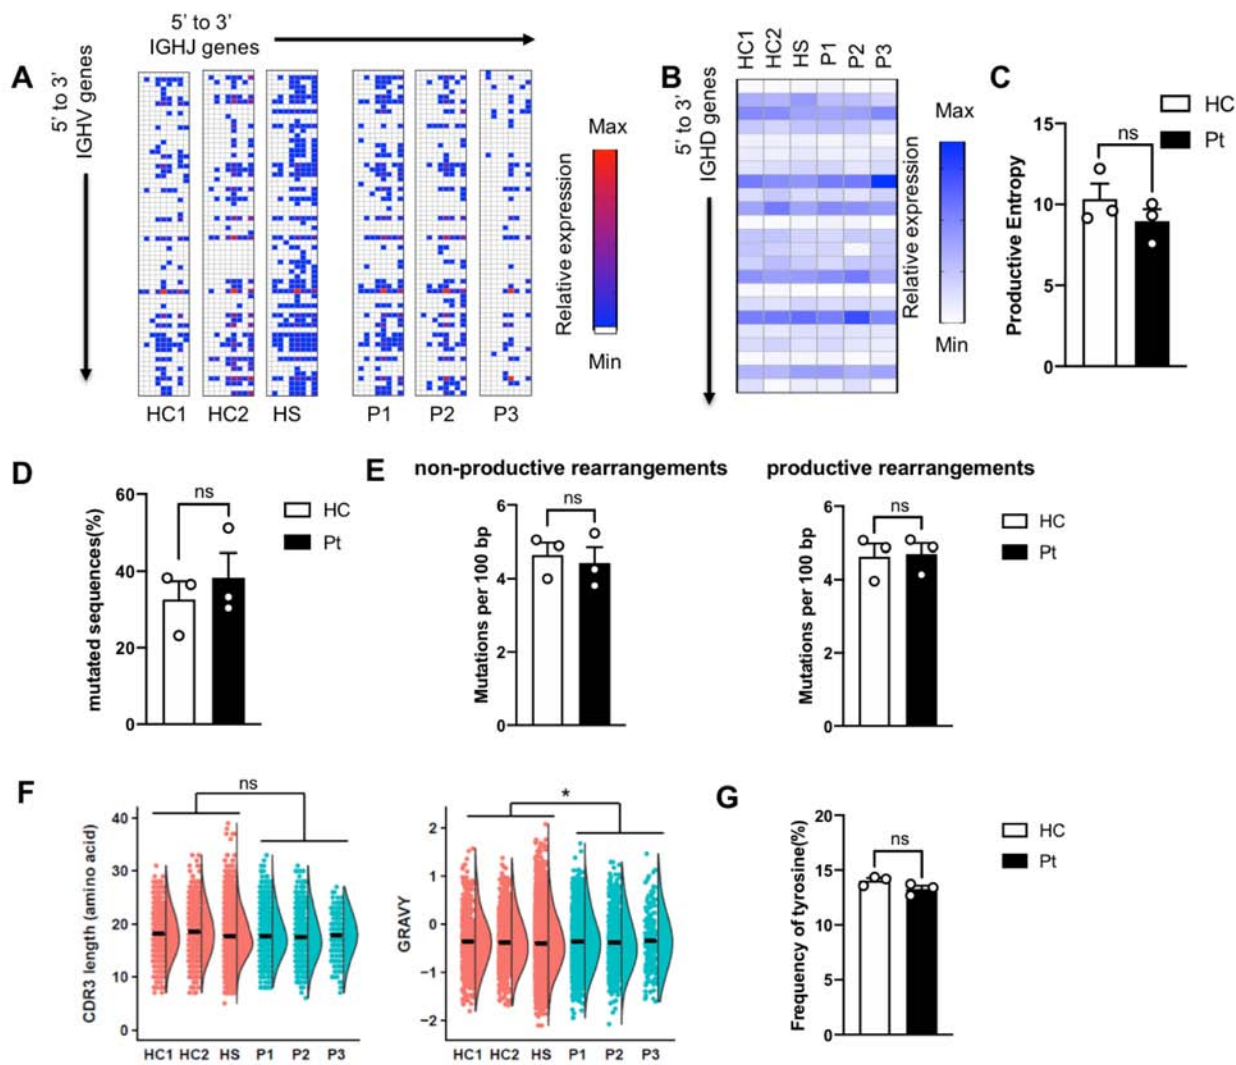

1           **Combined Immunodeficiency due to a loss of function mutation in DNA**

2                                           **Polymerase Delta 1**

3   Ye Cui, PhD,<sup>1</sup> Sevgi Keles, MD,<sup>2</sup> Louis-Marie Charbonnier, PhD,<sup>1</sup> Amélie M. Julé,  
4   PhD,<sup>1</sup> Lauren Henderson, MD, MSc.<sup>1</sup> Seyma Celikbilek Celik, BSc,<sup>2</sup> Ismail Reisli, MD,<sup>2</sup>  
5   Chen Shen, PhD,<sup>3,4</sup> Wen Jun Xie, PhD,<sup>5</sup> Klaus Schmitz-Abe, PhD,<sup>6</sup> Hao Wu, PhD,<sup>1,3</sup>  
6   Talal A. Chatila, MD, MSc<sup>1</sup>

7   <sup>1</sup>Division of Immunology, The Boston Children's Hospital. Department of Pediatrics,  
8   Harvard Medical School, Boston; <sup>2</sup>Necmettin Erbakan University, Meram Medical  
9   Faculty, Division of Pediatric Allergy and Immunology, Konya; <sup>3</sup>Program in Molecular  
10   and Cellular Medicine, Department of Pediatrics, Boston Children's Hospital, Harvard  
11   Medical School, Boston; <sup>4</sup>Department of Biological Chemistry and Molecular  
12   Pharmacology, Harvard Medical School, Boston; <sup>5</sup>Department of Chemistry,  
13   Massachusetts Institute of Technology, Cambridge; <sup>6</sup>Division of Newborn Medicine and  
14   Neonatal Genomics Program, Boston Children's Hospital, Harvard Medical School,  
15   Boston.

16  
17   **Corresponding Author:** Talal A. Chatila at the Division of Immunology, Boston  
18   Children's Hospital and the Department of Pediatrics, Harvard Medical School.

19   Address: Karp Family Building, Room 10-214. 1 Blackfan Street, Boston, MA 02115

20   Email: [talal.chatila@childrens.harvard.edu](mailto:talal.chatila@childrens.harvard.edu)

21



Journal Pre-proof

## 23 **Supplementary Methods**

24 **Whole exome sequencing and data analysis:** WES data was processed through  
25 Variant Explorer Pipeline (VExP) using BWA aligner (version 0.7.17) for mapping reads  
26 to the human genome (hg19) and PICARDtools (V2.20.2) to mark/delete duplicate  
27 reads. Single Nucleotide Variants (SNVs) and small insertions / deletions (indels) were  
28 jointly called across all samples using both GATK (multi-sample variant calling, v4.1)  
29 and SAMTools (v1.9). Further, VExP was performed to annotate 21 relevant genetic  
30 databases (from Allele frequency and Gene-phenotype consortiums) and 23  
31 coding/non-coding variant pathogenicity predictors into the output of the system. Variant  
32 analysis was performed using different inheritance models (assuming full penetrance)  
33 based on three filtering criteria: first, include variants predicted to have a potential  
34 functional coding consequence, including stop gain or loss, splice site disruption, indel,  
35 and nonsynonymous. Second, variants were filtered based on allele frequency in control  
36 populations (gnomAD, ExAC, EVS, 1000GP and internal data from 2,114 unaffected  
37 individuals from BCH). The variants were further prioritized to include those with read  
38 depth  $\geq 10X$  and deleterious prediction (2 or more of 23 softwares, including PolyPhen,  
39 SIFT, FATHMM, CADD, etc). For pedigree-consistency analysis, VExP had verified  
40 consistency within all family members.

41 **Homozygosity mapping:** We use Variant Explorer Pipeline "VExP" to determine  
42 homozygous regions using whole genome sequencing data (WES). In summary, the  
43 method uses a sliding window approach, 100 SNPs, and retained segments with a  
44 minimum of 98% homozygosity. Homozygous SNPs cannot be more than 100 Kb away  
45 from each other. Next, VExP joins all the homozygous regions using several

46 considerations including regions with no genes or noncoding genes. It retains only  
47 segments where observed homozygosity exceeds 3 cM and avoid the effect of residual  
48 population homozygosity that is likely innocuous and tolerated by natural selection. We  
49 use genetic, as opposed to physical distance, for all calculations. To calculate overall  
50 homozygosity for every sample, we sum all segments exceeding 3 cM. Homozygosity  
51 Mapping is applied to the results from the whole family, obtaining overlapping  
52 homozygous regions between affected individuals with no overlapping with unaffected  
53 samples (**Fig E1, Table E2**).

---

54 **Reference:**

- 55 1. Kyte J, Doolittle RF. A simple method for displaying the hydrophobic character of  
56 a protein. J Mol Biol 1982; 157:105-32.  
57

Journal Pre-proof

58 **Supplementary Figure Legends**

59 **Figure E1.** Homozygous regions identified in chromosome 19 using WES and  
60 segregating within the family (Homozygosity mapping).

61 **Figure E2. A.** Distance measurement between residue 1060 and 830 in wild-type and  
62 mutant POLD1. Longer distance in the mutant POLD1 reflects the interaction lost  
63 between CysB and POLBc\_delta domains. **B.** Hydrogen bond (HB) tracing of the  
64 interaction between R1060 and E830 in POLD1. 1 means HB exists, 0 means HB  
65 disappears.

66 **Figure E3.** POLD1<sup>R1060C</sup> patients are normal in regulatory T cell frequency and  
67 phenotype. **A.** Representative dot plot analysis of CD25<sup>hi</sup> CD127<sup>lo</sup> CD4<sup>+</sup> T cells in  
68 patient vs. a control subject. **B.** Percentages of CD25<sup>hi</sup> CD127<sup>lo</sup> CD4<sup>+</sup> T cells in the  
69 peripheral blood of healthy controls (n=3; open circles) and POLD1<sup>R1060C</sup> patients (n=3;  
70 closed circles). **C.** Representative dot plot analysis of Helios<sup>-</sup> CD25<sup>hi</sup> CD127<sup>lo</sup> CD4<sup>+</sup> T  
71 cells in patient vs. a control subject. **D.** Mean fluorescence intensity of the respective  
72 regulatory T cell marker in patient and control subjects. ns, not significant, by unpaired  
73 two-tailed Student's t-test.

74 **Figure E4.** Profiles of IGHV-IGHJ pairing and somatic hypermutation (SHM) analysis in  
75 POLD1<sup>R1060C</sup> B Cells. **A.** Frequencies of specific IGHV and IGHJ pairing in unique *IGH*  
76 clonotypes of B cells from healthy controls and patients. White represents the absence  
77 of a given IGHV and IGHJ pairing. Blue reflects a low frequency while red represents a  
78 higher frequency of usage. **B.** Frequencies of specific IGD gene usage in unique *IGH*  
79 clonotypes of B cells from healthy controls and patients. White represents the lowest  
80 gene usage. Blue reflects a higher frequency of usage. **C.** Productive entropy of B cells

81 in healthy controls versus patients (n=3; open circles). **D.** Percentage of sequences  
82 carrying at least one somatic hypermutation (SHM) among all unique rearrangements  
83 (productive and non-productive) with resolved V family, gene or allele. **E.** Number of  
84 mutations per 100 bp within the IGH V segment of unique rearrangements with at least  
85 one mutation in non-productive rearrangements and productive rearrangements. **F.**  
86 Amino acid properties of *in silico* translated IGH-CDR3 region, for unique productive  
87 rearrangements encoding a complete CDR3 region (starting and ending with consensus  
88 codons). CDR3 length: control vs. patient group,  $p>0.1$ ; subject effect,  $p<10e-6$ .  
89 GRAVY, Grand Average of Hydrophobicity<sup>1</sup>: control vs. patient group,  $p= 0.0490$ ;  
90 subject effect,  $p>0.4$ .). **G.** Proportion of tyrosine residue in the IGH-CDR3 of unique  
91 sequences: control vs. patient group (n=3; open circles). **C, D, E** and **G** were analyzed  
92 with Student's unpaired two tailed t test. Results represent means  $\pm$  S.E.M. ns, not  
93 significant. **F** was analyzed with 2-way ANOVA, to contrast sequences patterns  
94 between patients and control while accounting for per-subject variations. ns, not  
95 significant; \*,  $p<0.5$ .  
96
